# Supplementary material for: Deferasirox Targeting Ferroptosis Synergistically Ameliorates Myocardial Ischemia Reperfusion Injury in Conjunction With Cyclosporine A
Source: PubMed Central journal article supplement — J Am Heart Assoc. 2023 Dec 29;13(1):e031219. doi: 10.1161/JAHA.123.031219 (PMC10863836; doi:10.1161/jaha.123.031219), 2023-12-29
Supplement: JAH3-13-e031219-s001.pdf [file JAH3-13-e031219-s001.pdf]

# **SUPPLEMENTAL MATERIAL**

**Figure S1. Cytoplasmic and mitochondrial iron levels after hypoxia and treatment with vehicle (Veh) or deferasirox (DFX).**

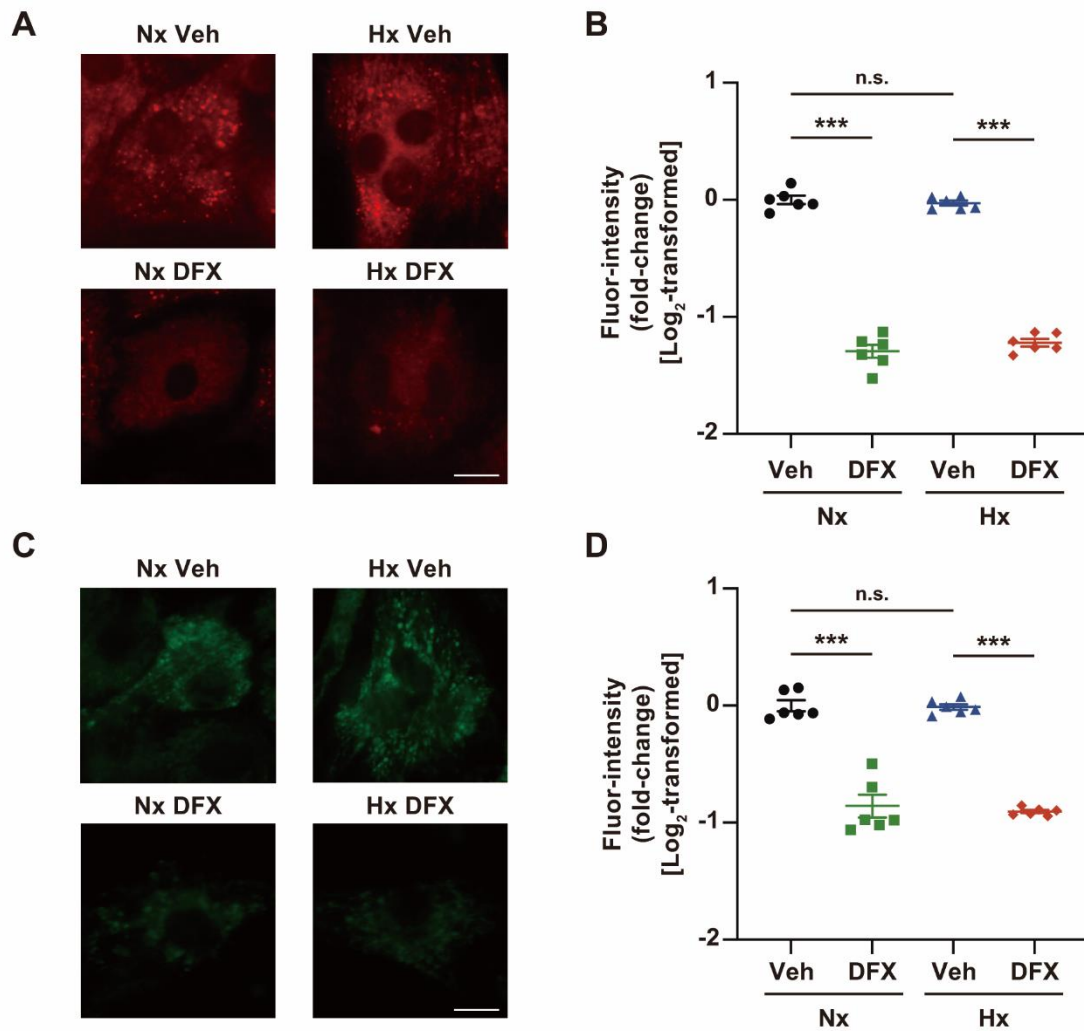

**A**, Cytoplasmic iron, fluor-stained with FerroOrange. Scale bar: 10  $\mu$ m. **B**, Quantification of fluor-intensity, stained with FerroOrange (n = 6, each group). **C**, Mitochondrial iron, fluor-stained with MitoFerroGreen. Scale bar: 10  $\mu$ m. **D**, Quantification of fluor-intensity, stained with MitoFerroGreen (n = 6, each group). Data are presented as the mean  $\pm$  SEM. Statistical significance was determined using one-way ANOVA with Tukey's post-hoc test. \*\*\* $P < 0.001$ . n.s. indicates "non-significant."

**Figure S2. Western blot analysis of sham or I/R-injured myocardium, treated with vehicle (Veh) or deferasirox (DFX).**

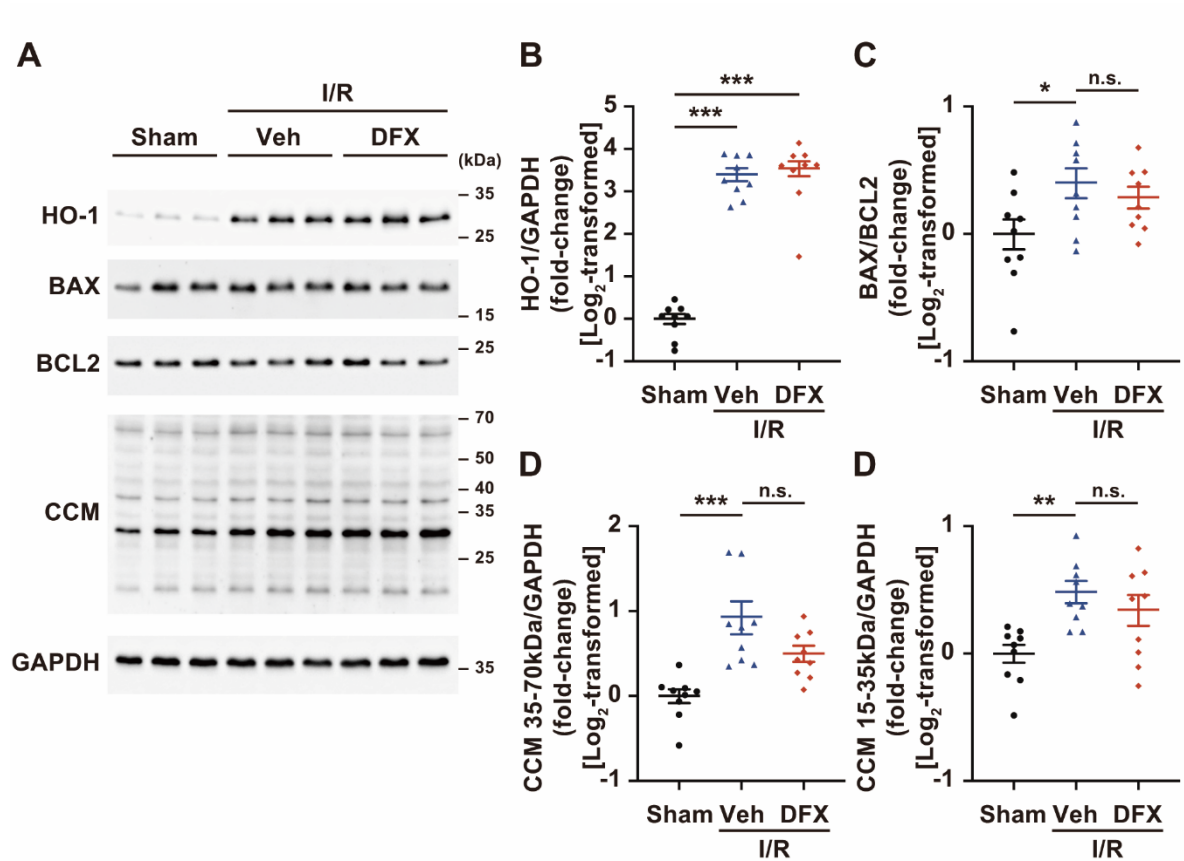

**A**, Western blots of sham or I/R-injured myocardium 24 h after I/R injury. HO-1, heme oxygenase-1; CCM, cleaved caspase motif. **B-E**, Quantification of HO-1 (**B**), BAX/BCL2 ratio (**C**), CCM (35-70 kDa, **D**), and CCM (15-35 kDa, **E**).  $n = 9$ , each group. Data are presented as the mean  $\pm$  SEM. Statistical significance was determined using one-way ANOVA with Tukey's post-hoc test. n.s., non-significant. \* $P < 0.05$ , \*\* $P < 0.01$ , \*\*\* $P < 0.001$ .
